# Supplementary material
Source: PubMed Central journal article supplement (PMC7642646)
Supplement: ajcr0010-3395-f3.pdf [file ajcr0010-3395-f3.pdf]

## Determinants for age disparities in colon cancer survival improvement

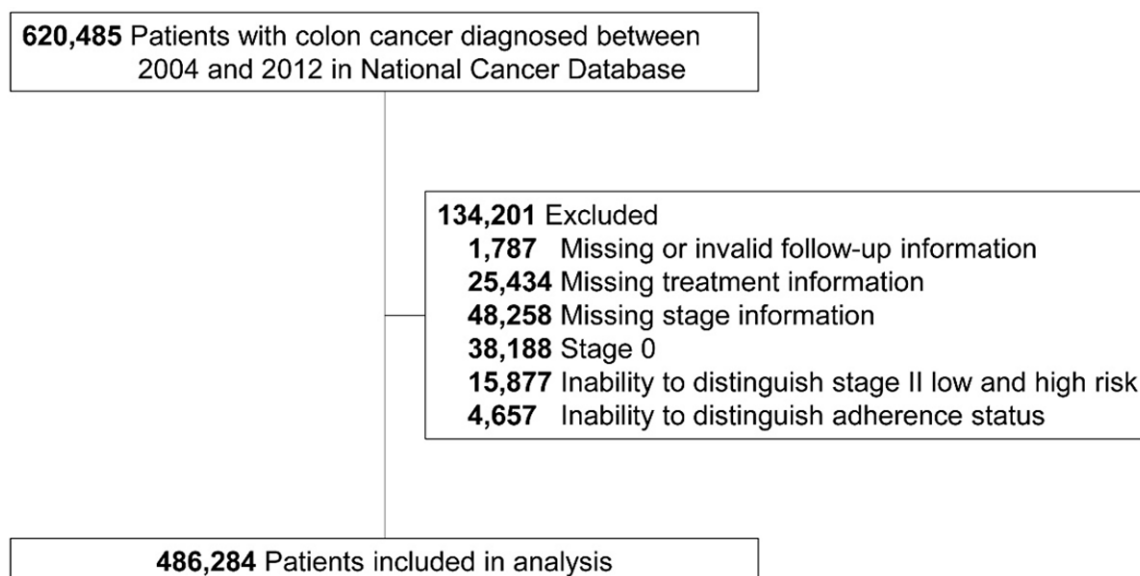

Supplementary Figure 1. CONSORT diagram.

Supplementary Table 1. Characteristics of patients with colon cancer by ages<sup>a</sup>

| Variables                      | Age groups, y (n, %) |                |                |                |
|--------------------------------|----------------------|----------------|----------------|----------------|
|                                | <50                  | 50-64          | 65-74          | ≥75            |
| <b>Sex</b>                     |                      |                |                |                |
| Male                           | 22,594 (50.1)        | 69,342 (53.1)  | 63,651 (52.0)  | 78,671 (41.8)  |
| Female                         | 22,505 (49.9)        | 61,214 (46.9)  | 58,866 (48.0)  | 109,441 (58.2) |
| <b>Race</b>                    |                      |                |                |                |
| White                          | 34,557 (76.6)        | 102,752 (78.7) | 102,958 (84.0) | 168,120 (89.4) |
| Black                          | 7,796 (17.3)         | 21,415 (16.4)  | 14,615 (11.9)  | 14,461 (7.7)   |
| Other                          | 2,305 (5.1)          | 5,161 (4.0)    | 3,867 (3.2)    | 4,214 (2.2)    |
| Unknown                        | 441 (1.0)            | 1,228 (0.9)    | 1,077 (0.9)    | 1,317 (0.7)    |
| <b>Year of diagnosis</b>       |                      |                |                |                |
| 2004-2006                      | 13,411 (29.7)        | 39,663 (30.4)  | 39,742 (32.4)  | 63,897 (34.0)  |
| 2007-2009                      | 14,681 (32.6)        | 42,725 (32.7)  | 39,568 (32.3)  | 61,711 (32.8)  |
| 2010-2012                      | 17,007 (37.7)        | 48,168 (36.9)  | 43,207 (35.3)  | 62,504 (33.2)  |
| <b>Residence</b>               |                      |                |                |                |
| Metro                          | 37,013 (82.1)        | 105,115 (80.5) | 96,148 (78.5)  | 152,858 (81.3) |
| Urban                          | 5,746 (12.7)         | 18,763 (14.4)  | 19,276 (15.7)  | 24,567 (13.0)  |
| Rural                          | 706 (1.6)            | 2,532 (1.9)    | 2,969 (2.4)    | 3,815 (2.0)    |
| Unknown                        | 1,634 (3.6)          | 4,146 (3.2)    | 4,124 (3.4)    | 6,872 (3.7)    |
| <b>Annual household income</b> |                      |                |                |                |
| <\$30,000                      | 6,359 (14.1)         | 19,864 (15.2)  | 17,887 (14.6)  | 22,962 (12.2)  |
| \$30,000-\$34,999              | 7,821 (17.4)         | 23,725 (18.2)  | 23,492 (19.2)  | 33,464 (17.8)  |
| \$35,000-\$45,999              | 11,590 (25.7)        | 34,355 (26.3)  | 33,638 (27.4)  | 52,562 (27.9)  |
| ≥\$46,000                      | 17,742 (39.3)        | 48,226 (36.9)  | 43,493 (35.5)  | 73,359 (39.0)  |
| Unknown                        | 1,587 (3.5)          | 4,386 (3.4)    | 4,007 (3.3)    | 5,765 (3.1)    |
| <b>Insurance</b>               |                      |                |                |                |
| No insurance                   | 4,028 (8.9)          | 9,673 (7.4)    | 909 (0.7)      | 679 (0.4)      |
| Private insurance              | 32,211 (71.4)        | 90,471 (69.3)  | 18,097 (14.8)  | 16,890 (9.0)   |

## Determinants for age disparities in colon cancer survival improvement

|                                         |               |                |                |                |
|-----------------------------------------|---------------|----------------|----------------|----------------|
| Government insurance                    | 7,799 (17.3)  | 27,653 (21.2)  | 101,714 (83.0) | 168,227 (89.4) |
| Unknown                                 | 1,061 (2.4)   | 2,759 (2.1)    | 1,797 (1.5)    | 2,316 (1.2)    |
| Educational attainment                  |               |                |                |                |
| ≥29%                                    | 8,215 (18.2)  | 24,298 (18.6)  | 21,139 (17.3)  | 25,897 (13.8)  |
| 20%-28.9%                               | 10,425 (23.1) | 30,977 (23.7)  | 29,683 (24.2)  | 40,950 (21.8)  |
| 14%-19.9%                               | 10,057 (22.3) | 30,235 (23.2)  | 29,631 (24.2)  | 48,244 (25.6)  |
| <14%                                    | 14,813 (32.9) | 40,652 (31.1)  | 38,058 (31.0)  | 67,260 (35.8)  |
| Unknown                                 | 1,589 (3.5)   | 4,394 (3.4)    | 4,006 (3.3)    | 5,761 (3.0)    |
| Facility type                           |               |                |                |                |
| Community                               | 3,617 (8.0)   | 16,004 (12.3)  | 16,684 (13.6)  | 26,586 (14.1)  |
| Comprehensive community                 | 14,651 (32.5) | 59,569 (45.6)  | 60,974 (49.8)  | 97,563 (51.9)  |
| Academic/research program               | 11,481 (25.5) | 40,160 (30.8)  | 31,378 (25.6)  | 43,102 (22.9)  |
| Integrated network                      | 3,836 (8.5)   | 14,823 (11.3)  | 13,481 (11.0)  | 20,861 (11.1)  |
| Unknown                                 | 11,514 (25.5) | 0 (0.0)        | 0 (0.0)        | 0 (0.0)        |
| Charlson comorbidity score              |               |                |                |                |
| 0                                       | 39,669 (88.0) | 99,067 (75.9)  | 80,375 (65.6)  | 117,122 (62.3) |
| 1                                       | 4,509 (10.0)  | 24,522 (18.8)  | 30,476 (24.9)  | 49,071 (26.1)  |
| 2                                       | 921 (2.0)     | 6,967 (5.3)    | 11,666 (9.5)   | 21,919 (11.6)  |
| Surgery                                 |               |                |                |                |
| Yes                                     | 40,852 (90.6) | 118,391 (90.7) | 112,572 (91.9) | 169,195 (89.9) |
| No                                      | 4,247 (9.4)   | 12,165 (9.3)   | 9,945 (8.1)    | 18,917 (10.1)  |
| Chemotherapy                            |               |                |                |                |
| Yes                                     | 29,775 (66.0) | 68,847 (52.7)  | 49,959 (40.8)  | 36,146 (19.2)  |
| No                                      | 15,324 (34.0) | 61,709 (47.3)  | 72,558 (59.2)  | 151,966 (80.8) |
| Stage                                   |               |                |                |                |
| I                                       | 7,251 (16.1)  | 30,788 (23.6)  | 32,447 (26.5)  | 46,309 (24.6)  |
| II                                      | 8,799 (19.5)  | 27,231 (20.9)  | 30,365 (24.8)  | 58,552 (31.1)  |
| III                                     | 14,810 (32.8) | 38,404 (29.4)  | 34,516 (28.2)  | 49,765 (26.5)  |
| IV                                      | 14,239 (31.6) | 34,133 (26.1)  | 25,189 (20.5)  | 33,486 (17.8)  |
| Histology                               |               |                |                |                |
| Adenocarcinomas                         | 42,764 (94.8) | 126,107 (96.6) | 119,118 (97.2) | 181,462 (96.5) |
| Others                                  | 2,335 (5.2)   | 4,449 (3.4)    | 3,399 (2.8)    | 6,650 (3.5)    |
| Grade                                   |               |                |                |                |
| Well differentiated                     | 4,411 (9.8)   | 13,529 (10.4)  | 12,800 (10.4)  | 17,973 (9.5)   |
| Moderately differentiated               | 26,148 (58.0) | 79,784 (61.1)  | 75,448 (61.6)  | 112,568 (59.8) |
| Poorly differentiated                   | 8,818 (19.6)  | 21,812 (16.7)  | 21,426 (17.5)  | 36,810 (19.6)  |
| Undifferentiated                        | 1,057 (2.3)   | 2,377 (1.8)    | 2,478 (2.0)    | 4,470 (2.4)    |
| Unknown                                 | 4,665 (10.3)  | 13,054 (10.0)  | 10,365 (8.5)   | 16,291 (8.7)   |
| Treatment adherence status <sup>b</sup> |               |                |                |                |
| Adherence                               | 36,410 (80.7) | 101,775 (78.0) | 89,593 (73.1)  | 102,891 (54.7) |
| Non-adherence                           | 8,689 (19.3)  | 28,781 (22.0)  | 32,924 (26.9)  | 85,221 (45.3)  |

<sup>a</sup>The comparison of the distribution of characteristics across age groups were all of statistical significance (all P<0.001). <sup>b</sup>Adherence status to NCCN treatment guidelines.

## Determinants for age disparities in colon cancer survival improvement

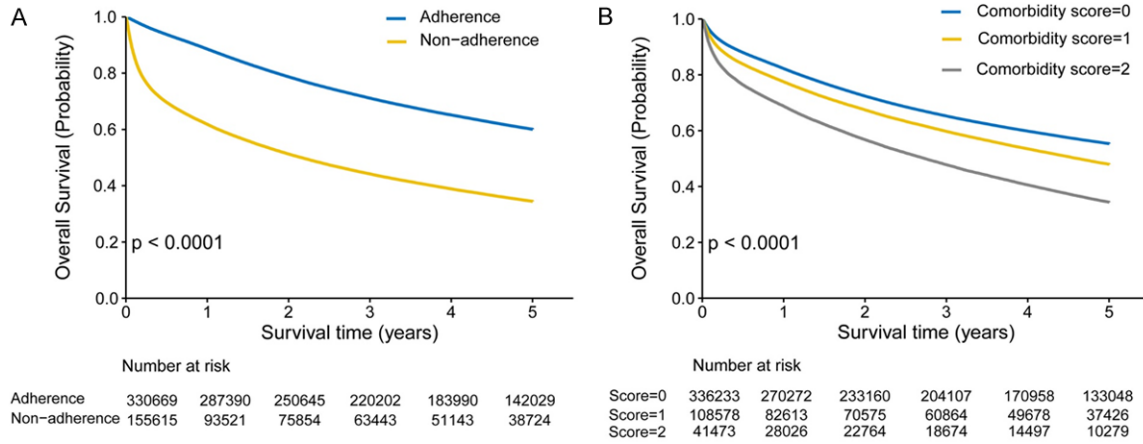

**Supplementary Figure 2.** Crude 5-year overall survival rates of colon cancer. (A) by adherence status to NCCN treatment guidelines, (B) by Charlson comorbidity score. P values were calculated by the log-rank test.

**Supplementary Table 2.** Association between Charlson comorbidity score and the risk of death among patients with colon cancer stratified by age

| Strata     | Charlson comorbidity score=1 |                          |                          | Charlson comorbidity score=2 |                          |                          |
|------------|------------------------------|--------------------------|--------------------------|------------------------------|--------------------------|--------------------------|
|            | patients/death               | HR (95% CI) <sup>a</sup> | HR (95% CI) <sup>b</sup> | patients/death               | HR (95% CI) <sup>a</sup> | HR (95% CI) <sup>b</sup> |
| Aged <50   | 4,509/1,613                  | 1.06 (1.01-1.12)         | 1.06 (1.01-1.12)         | 921/478                      | 1.68 (1.53-1.84)         | 1.65 (1.50-1.81)         |
| Aged 50-64 | 24,522/9,163                 | 1.16 (1.13-1.19)         | 1.16 (1.13-1.19)         | 6,967/3,461                  | 1.75 (1.69-1.81)         | 1.71 (1.65-1.77)         |
| Aged 65-74 | 30,476/12,973                | 1.26 (1.23-1.28)         | 1.25 (1.22-1.27)         | 11,666/6,530                 | 1.95 (1.90-2.01)         | 1.86 (1.81-1.91)         |
| Aged ≥75   | 49,071/29,950                | 1.23 (1.21-1.25)         | 1.22 (1.20-1.23)         | 21,919/15,562                | 1.68 (1.65-1.71)         | 1.60 (1.57-1.63)         |

Abbreviations: HR, Hazard Ratio. <sup>a</sup>Charlson comorbidity score is equal to zero as the reference. Adjustment for age, sex, race, residence, education, income, facility type, insurance, histology, grade, TNM stage. <sup>b</sup>Additional adjustment for adherence to treatment guidelines.

## Determinants for age disparities in colon cancer survival improvement

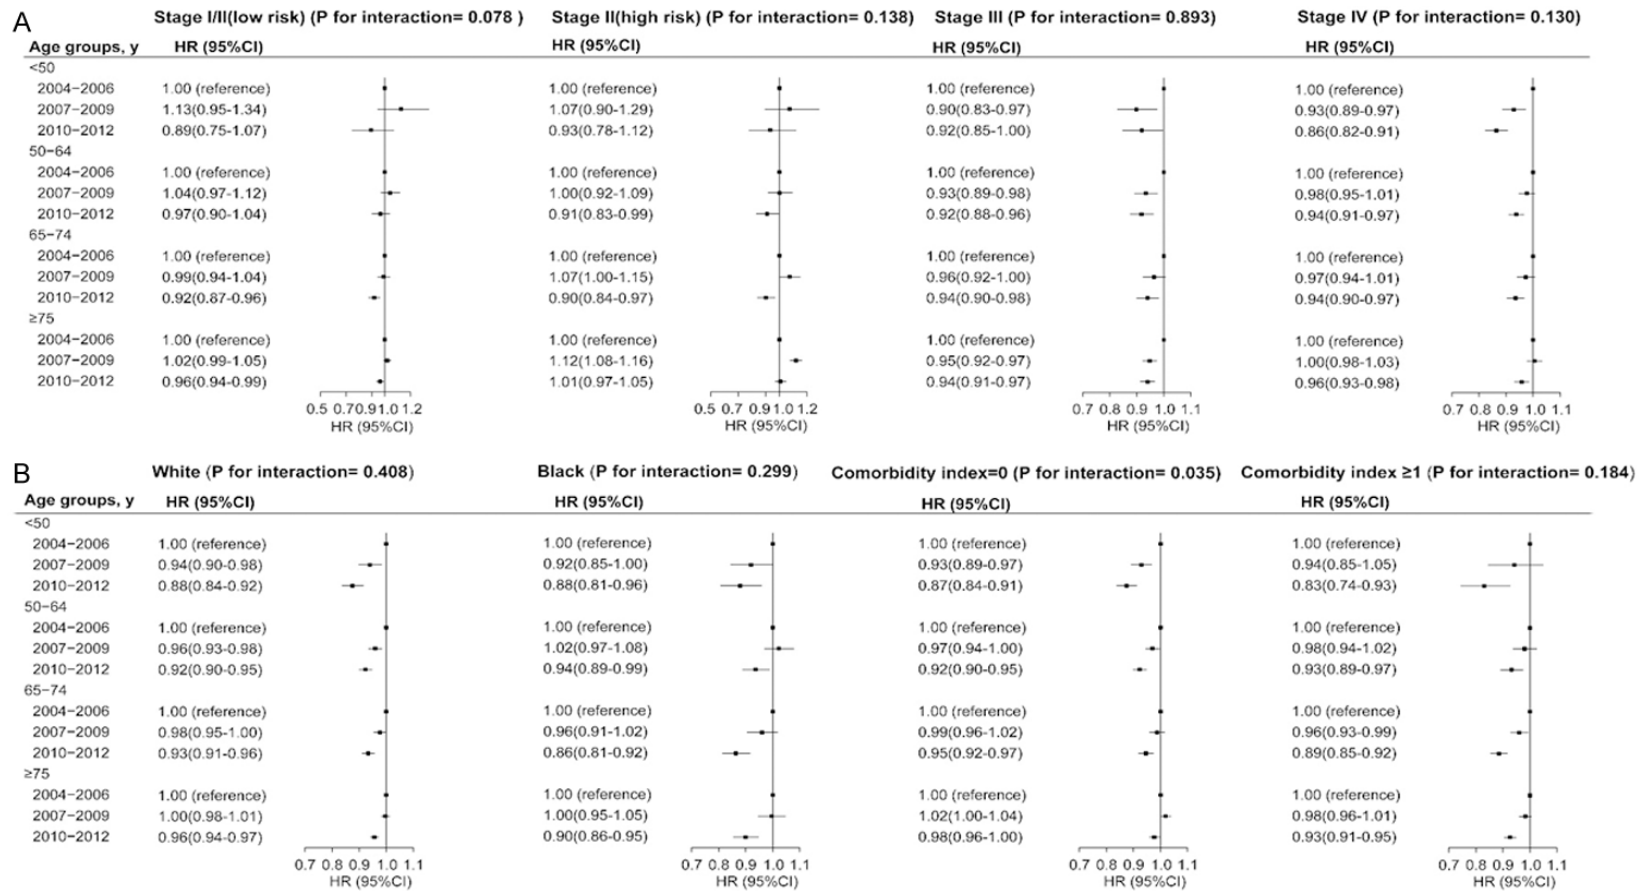

**Supplementary Figure 3.** Multivariate adjusted hazard ratios (HRs) and 95% CIs for the risk of death associated with year of diagnosis across all age groups. A. Stratified by TNM stage. B. Stratified by race or Charlson comorbidity score. The HRs and 95% CIs were adjusted for age, sex, race, residence, education, income, facility type, insurance, histology, grade, TNM stage, Charlson comorbidity score, and adherence status to NCCN treatment guidelines. *P* values for interactions between age and year of diagnosis are displayed.
